1 ***Pseudomonas aeruginosa* promotes persistence of *Stenotrophomonas***  
2 ***maltophilia* via increased adherence to depolarized respiratory epithelium**  
3 **Running title:** *S. maltophilia* adherence in polymicrobial infection (Word Count: 52  
4 characters and spaces)

5 **Key words:** *Stenotrophomonas maltophilia*, *Pseudomonas aeruginosa*, polymicrobial  
6 infection, Type IV Pilus, adherence, respiratory epithelium

7  
8 Melissa S. McDaniel<sup>1,2</sup>, Natalie R. Lindgren<sup>1,2</sup>, Caitlin E. Billiot<sup>1,2</sup>, Kristina N.  
9 Valladares<sup>1,2</sup>, Nicholas A. Sumpter<sup>3</sup>, and W. Edward Swords<sup>1,2#</sup>

10 <sup>1</sup> Division of Pulmonary, Allergy and Critical Care Medicine

11 <sup>2</sup> Gregory Fleming James Center for Cystic Fibrosis Research

12 <sup>3</sup> Division of Clinical Immunology and Rheumatology

13 University of Alabama at Birmingham

14

15 # Communicating author:

16 1918 University Boulevard, MCLM 818

17 Birmingham, AL 35294

18 [wswords@uabmc.edu](mailto:wswords@uabmc.edu)

19 Telephone: 205-975-5333

20 **ABSTRACT:**

21 *Stenotrophomonas maltophilia* is an emerging opportunistic respiratory pathogen in  
22 patients with cystic fibrosis (CF). *S. maltophilia* is frequently observed in polymicrobial  
23 infections, and we have previously shown that *Pseudomonas aeruginosa* promotes  
24 colonization and persistence of *S. maltophilia* in mouse respiratory infections. In this  
25 study, we used host and bacterial RNA sequencing to further define this interaction. To  
26 evaluate *S. maltophilia* transcript profiles we used a recently described method for  
27 selective capture of bacterial mRNA transcripts with strain specific RNA probes. We  
28 found that factors associated with the type IV pilus, including the histidine kinase  
29 subunit of a chemotactic two-component signaling system (*chpA*), had increased  
30 transcript levels during polymicrobial infection. Using immortalized CF respiratory  
31 epithelial cells, we found that infection with *P. aeruginosa* increases adherence of *S.*  
32 *maltophilia*, at least in part due to disruption of epithelial tight junctions. In contrast, an  
33 isogenic *S. maltophilia chpA* mutant lacked cooperative adherence to CF epithelia and  
34 decreased bacterial burden *in vivo* in polymicrobial infections with *P. aeruginosa*.  
35 Similarly, *P. aeruginosa* lacking elastase (*lasB*) did not promote *S. maltophilia*  
36 adherence or bacterial colonization and persistence *in vivo*. Based on these results, we  
37 conclude that disruption of lung tissue integrity by *P. aeruginosa* promotes adherence of  
38 *S. maltophilia* to the lung epithelia in a type IV pilus-dependent manner. These data  
39 provide insight into *S. maltophilia* colonization and persistence in patients in later stages  
40 of CF disease and may have implications for interactions with other bacterial  
41 opportunists.

42 WORD COUNT: 241

43 **IMPORTANCE**

44 Despite advances in treatment options for patients with cystic fibrosis (CF),  
45 complications of bacterial infections remain the greatest driver of morbidity and mortality  
46 in this patient population. These infections often involve more than one bacterial  
47 pathogen, and our understanding of how inter-species interactions impact disease  
48 progression is lacking. Previous work in our lab found that two CF pathogens,  
49 *Stenotrophomonas maltophilia* and *Pseudomonas aeruginosa* can cooperatively infect  
50 the lung to cause more severe infection. In the present study, we found that infection  
51 with *P. aeruginosa* promotes persistence of *S. maltophilia* by interfering with epithelial  
52 barrier integrity. Depolarization of the epithelial cell layer by *P. aeruginosa* secreted  
53 elastase increased *S. maltophilia* adherence, likely in a type IV pilus-dependent  
54 manner. Ultimately, this work sheds light on the molecular mechanisms governing an  
55 important polymicrobial interaction seen in pulmonary diseases such as CF.

56 WORD COUNT: 138

57

58

## 59 INTRODUCTION

60 *Stenotrophomonas maltophilia* is a Gram-negative bacillus that can be found in a  
61 variety of environmental sources, including in hospital tubing and water systems (1-4).  
62 As an opportunistic pathogen, *S. maltophilia* is most commonly associated with  
63 respiratory infections including ventilator-associated pneumonia (VAP), and chronic  
64 airway diseases like cystic fibrosis (CF) (5-8). In the context of CF, detection of *S.*  
65 *maltophilia* in patient sputa has been correlated with worse lung function (9, 10). Whole  
66 genome sequencing of *S. maltophilia* has revealed homologs of many known virulence  
67 factors including fimbriae, flagella, and type IV pili (11). There is a pressing need for a  
68 better definition of factors involved in colonization, persistence and/or virulence of *S.*  
69 *maltophilia*.

70 *Pseudomonas aeruginosa* is a Gram-negative bacillus that, like *S. maltophilia*,  
71 can be found in a variety of environmental contexts. It is an opportunistic pathogen,  
72 primarily affecting those with an underlying immunodeficiency or disease, and is a  
73 common opportunist observed in patients with CF, where it contributes significantly to  
74 morbidity and mortality (8). *P. aeruginosa* has a relatively large genome (~6.5 Mb),  
75 harboring many virulence factors that have been identified and characterized (12).  
76 Importantly, *P. aeruginosa* can secrete a number of toxins and extracellular proteases,  
77 notably ExoA, elastase, and pyocyanin, that can contribute to lung function decline and  
78 can work synergistically to compromise airway barrier integrity (13).

79           In chronic lung diseases such as CF, infections are often polymicrobial, and inter-  
80 species dynamics can play a large role in patient outcomes. Reports indicate that *P.*  
81 *aeruginosa* can cause polymicrobial infections with *S. maltophilia* in patients with CF,  
82 VAP, and more recently, hospital acquired pneumonia in patients hospitalized for  
83 COVID-19 (14-17). Several *in vitro* studies have suggested mechanisms of cooperativity  
84 between *S. maltophilia* and *P. aeruginosa*, including changes in antibiotic tolerance and  
85 biofilm formation by *S. maltophilia*, and increased alginate and toxin production by *P.*  
86 *aeruginosa* (18, 19). In previous work, we demonstrated cooperativity between *P.*  
87 *aeruginosa* and *S. maltophilia* during polymicrobial infection in the mouse respiratory  
88 tract (20). In this study, intratracheal infection with *S. maltophilia* and *P. aeruginosa*  
89 resulted in a significantly higher bacterial burden of *S. maltophilia* in lung homogenate,  
90 and a longer time to clearance as compared to mice infected with *S. maltophilia* alone.

91           In this study, we sought to understand the mechanism by which *P. aeruginosa*  
92 promotes colonization with *S. maltophilia*. We used combined bacterial and host RNA-  
93 sequencing from murine pulmonary infections with *in vitro* adherence assays on  
94 polarized epithelium to elucidate the systems involved in cooperativity between *S.*  
95 *maltophilia* and *P. aeruginosa*. The results indicate that damage to the airway  
96 epithelium by *P. aeruginosa* elastase expression promotes increased adherence of *S.*  
97 *maltophilia*, likely via the type IV pilus.

98

99

## 100 RESULTS

### 101 Host response to single-species and polymicrobial infection is dominated by *P.* 102 *aeruginosa*-induced inflammatory response

103 Our recent work showed a cooperative interaction between two CF pathogens, *S.*  
104 *maltophilia* and *P. aeruginosa*, during murine pulmonary infection wherein the presence  
105 of *P. aeruginosa* promotes the persistence of *S. maltophilia*. (Fig. 1A) (20). In order to  
106 define the basis for this cooperativity, we first performed host RNA-sequencing analysis  
107 (RNA-seq) on whole lung from mice with mono- or polymicrobial infections. Mice were  
108 infected intratracheally with *S. maltophilia* K279a (inoculum  $\sim 10^7$  CFU), *P. aeruginosa*  
109 mPA08-31 (inoculum  $\sim 10^7$  CFU), or both, before total RNA was collected from the lung,  
110 prepared for sequencing, and sequenced at a depth of  $\sim 30$  million reads per sample.

111 Principal component analysis of mouse gene expression data showed close  
112 clustering of *P. aeruginosa* and polymicrobial infection samples, while *S. maltophilia*  
113 infected animals clustered separately from both (Fig. 1B). Differential expression  
114 analysis between samples showed that 9,553 transcripts showed differential expression  
115 levels between polymicrobial infected mice and mice infected with *S. maltophilia* alone.  
116 Similarly, 7,940 transcripts differed between mice infected with *P. aeruginosa* alone and  
117 mice infected with *S. maltophilia* alone. Consistent with the principal component  
118 analysis, only 42 genes were differentially regulated between mice infected with *P.*  
119 *aeruginosa* alone and polymicrobial infected mice. Of the 9,553 differentially expressed  
120 transcripts between polymicrobial infected mice and mice infected with *S. maltophilia*  
121 alone, 6,844 were also differentially expressed between mice infected with *P.*

122 *aeruginosa* alone and mice infected with *S. maltophilia* alone. Only 21 transcripts were  
123 differentially expressed in all three comparisons (Fig. 1C).

124 To determine which biological processes or pathways were affected during  
125 infection, we performed pathway enrichment analysis on the list of differentially  
126 expressed genes from each comparison. This was performed using ClusterProfiler (21)  
127 with both Gene Ontology (GO) biological processes and Kyoto Encyclopedia of Genes  
128 and Genomes (KEGG) pathway databases (Fig. 1D). Upregulated genes from the  
129 polymicrobial and *P. aeruginosa* infections compared to *S. maltophilia* infection were  
130 enriched for a total of 2,206 unique GO terms (1952 and 1918 respectively) and 81  
131 unique KEGG pathways (75 and 68 respectively). The 10 most enriched GO terms  
132 among upregulated genes included positive regulation of cytokine production ( $p_{\text{adj}} =$   
133  $6.71 \times 10^{-46}$ ,  $7.81 \times 10^{-39}$ ), cytokine mediated signaling pathways ( $p_{\text{adj}} = 1.12 \times 10^{-40}$ ,  
134  $1.76 \times 10^{-36}$ ), and the regulation of cell-to-cell adhesion ( $p_{\text{adj}} = 1.30 \times 10^{-31}$ ,  $1.68 \times 10^{-33}$ ).  
135 Of the 10 most enriched KEGG pathways implicated by upregulated genes, we  
136 identified known pro-inflammatory pathways including TNF ( $p_{\text{adj}} = 2.99 \times 10^{-21}$ ,  $4.02 \times$   
137  $10^{-20}$ ), and IL-17 signaling ( $p_{\text{adj}} = 9.03 \times 10^{-13}$ ,  $8.79 \times 10^{-13}$ ). The enrichment of these  
138 biological processes is consistent with an increase in acute inflammatory response and  
139 lung damage during *P. aeruginosa* infection (22). Downregulated genes in these  
140 comparisons were enriched for 1,321 unique GO terms (1,108 and 1,073 respectively)  
141 and 50 unique KEGG pathways (42 and 32 respectively). Interestingly, both cilium  
142 organization and cilium assembly processes were among the 10 most enriched GO  
143 terms for downregulated genes ( $p_{\text{adj}} = 1.89 \times 10^{-20}$ ,  $6.45 \times 10^{-14}$ ), indicating possible  
144 disruption of the mucociliary clearance mechanism (23). The 10 most enriched KEGG

145 pathways among downregulated genes highlighted many metabolic processes including  
146 amino acid degradation and fatty acid metabolism.

### 147 **Selective capture of bacterial mRNA and *in vivo* RNA-sequencing**

148 Traditionally, RNA-sequencing of pathogen transcripts in the lung is difficult due  
149 to the overwhelming proportion of host RNA as compared to bacterial RNA. To  
150 circumvent this, we employed a previously published method for selective hybridization  
151 and capture of bacterial mRNA, previously named pathogen-hybrid capture (PatH-Cap)  
152 (24). Strain-specific RNA probe libraries are used to capture pathogen-specific  
153 transcripts of interest, allowing for enrichment of bacterial mRNA transcripts and  
154 sequencing of the pathogen transcriptome with sufficient coverage, even in the context  
155 of RNA extracted from host tissue. We first generated an RNA probe set specific to *S.*  
156 *maltophilia* K279a, comprised of consecutive 100 bp segments covering each annotated  
157 open reading frame. The entire sense strand was covered, and a probe was generated  
158 for every other 100 bp segment on the antisense strand, as has been shown to increase  
159 efficiency of hybridization (24), for a total of 68,704 probes (Fig. S1). Probes were then  
160 synthesized as a pool of DNA oligonucleotides by Genscript (Piscataway, NJ), and  
161 reverse transcribed to produce a collection of biotinylated RNA “bait” probes.

162 Total RNA was isolated from lung tissue of mice infected as described above.  
163 We then hybridized the bacterial probes to the prepared cDNA libraries, and isolated  
164 hybridized transcripts via streptavidin bead-binding. Enriched cDNA pools were then  
165 sequenced at a depth of ~30 million reads per sample (Fig. 2). For the samples from  
166 mice infected with *S. maltophilia* in the absence of *P. aeruginosa*, transcript capture  
167 resulted in a 697-fold increase in reads mapping to the *S. maltophilia* transcriptome



168 (from 0.01% prior to enrichment, to 6.97% post enrichment). For those samples from  
169 mice infected with *S. maltophilia* and *P. aeruginosa*, this increase was 770-fold (from  
170 0.10% to 77.01%) (Table S1).

171 **Polymicrobial infection increases expression of adherence and chemotaxis-**  
172 **related genes in *S. maltophilia***

173 Principal component analysis of selective-capture enriched *S. maltophilia*  
174 transcript data showed distinct clustering between samples from mice infected with *S.*  
175 *maltophilia* alone and dual species infected samples (Fig. 3A). Differential expression  
176 analysis between samples showed 686 *S. maltophilia* genes that are differentially  
177 regulated ( $p_{\text{adj}} < 0.05$ ) between these two conditions. To account for disparities in  
178 genome coverage between sample groups, we filtered results for genes with detectable  
179 transcripts in 2 out of 4 total samples in each group, resulting in a total of 149  
180 differentially expressed genes. Of these, the top 5 significantly upregulated genes  
181 included a previously uncharacterized serine protease (*Smlt4395*,  $p_{\text{adj}} = 3.90 \times 10^{-5}$ ),  
182 and two genes involved in type IV pilus biogenesis or regulation, *chpA* (*Smlt3670*,  $p_{\text{adj}} =$   
183  $4.70 \times 10^{-5}$ ) and *pilO* (*Smlt3823*,  $p_{\text{adj}} = 2.63 \times 10^{-4}$ ) (25-27). Interestingly, one of the most  
184 significantly downregulated genes during polymicrobial infection was *cheR* (*Smlt2250*,  
185  $p_{\text{adj}} = 2.24 \times 10^{-4}$ ), a determinant in the regulation of flagellar movement (28), indicating  
186 that motility and attachment processes are changing in the context of polymicrobial  
187 infection (Fig. 3B). In support of this, of the 19 genes in 3 of the operons predicted to  
188 govern type IV pilus biogenesis and regulation in *S. maltophilia*, 12 genes (shown in  
189 color) were significantly upregulated during polymicrobial infection in the lung (Fig. 3C).  
190 This was not the case for genes involved in fimbriae or flagella regulation and

191 biogenesis. Only 1 of 47 total predicted flagella-related genes were significantly  
192 upregulated during polymicrobial infection, and no there was no significant change for  
193 *smf-1*, the major protein involved in fimbrial function (Table S2).

#### 194 **Pre-infection with *P. aeruginosa* increases adherence of *S. maltophilia* to** 195 **polarized epithelia**

196 The increased expression of genes involved in bacterial chemotaxis and  
197 adherence, combined with previous reports that exposure of epithelial cells to *P.*  
198 *aeruginosa* can promote *S. maltophilia* adherence (29) prompted us to investigate  
199 whether this was a viable mechanism for microbial cooperativity in the lung. To do this,  
200 we first polarized immortalized cystic fibrosis bronchial epithelial cells (CFBEs) by  
201 culturing them at the air-liquid interface. We then pre-treated the polarized epithelia with  
202 *P. aeruginosa* mPA08-31 (MOI = 20) for 2, 4, or 6 hours prior to inoculation with *S.*  
203 *maltophilia* K279a (MOI = 20) for 1 hour. Following this, we evaluated adherence via  
204 viable colony counts and confocal microscopy (Fig. 4A). We found that prior infection of  
205 cells with *P. aeruginosa* significantly increased the number of adherent *S. maltophilia* ( $P$   
206  $< 0.0001$ ), with the largest difference occurring at 6 hours post-infection (Fig. 4B) which  
207 corresponds with the time point at which the burden of *P. aeruginosa* is the highest (Fig.  
208 4C). Imaging of infected cells via confocal scanning laser microscopy (CSLM) showed  
209 more *S. maltophilia* present on cells previously infected with *P. aeruginosa* than on  
210 those exposed to cell culture media alone at all time points. We also found that *S.*  
211 *maltophilia* bound to epithelial cells near *P. aeruginosa*, with the largest foci of both  
212 bacteria present in cells following preceding infection with *P. aeruginosa* for 6 h. (Fig.  
213 4D).

214 **Infection with *P. aeruginosa* promotes adherence of *S. maltophilia* to a polarized**  
215 **epithelium in a *chpA* dependent manner**

216 The most significantly upregulated type IV pilus-related transcript identified in the  
217 RNA-seq experiment, *chpA* (*Smlt3670*), was the histidine kinase subunit of a two-  
218 component regulatory system characterized in *P. aeruginosa* and known to govern  
219 twitching motility (30). To see if this gene impacts cooperativity during polymicrobial  
220 infection, we created a clean deletion mutant of *chpA* in *S. maltophilia* K279a (see  
221 detailed procedures in Methods). We infected polarized CFBE epithelia with *P.*  
222 *aeruginosa* mPA08-31 for 2 h, 4 h, or 6 h and then added *S. maltophilia* K279a or *S.*  
223 *maltophilia* K279a *chpA* and quantified adhered bacteria via viable colony counts. As  
224 shown previously, prior infection with *P. aeruginosa* significantly increases the number  
225 of adhered *S. maltophilia* ( $P < 0.0001$ ). However, *S. maltophilia chpA* had significantly  
226 decreased adherence to the CFBE epithelial layer ( $P < 0.0001$ ), which was unaffected  
227 by preceding infection with *P. aeruginosa* (Fig. 5A). These data were confirmed by  
228 confocal laser scanning microscopy (CLSM) imaging of infected CFBE epithelial cells.  
229 The amount of *S. maltophilia* bound to cells increased when *P. aeruginosa* was present  
230 and could be seen adherent to the same regions as large clusters of *P. aeruginosa*.  
231 However, *S. maltophilia chpA* had significantly fewer adherent *S. maltophilia*, even in  
232 areas with abundant *P. aeruginosa* (Fig. 5B). To test impact of *S. maltophilia chpA* in  
233 vivo, we infected mice with both *S. maltophilia* and *S. maltophilia chpA* (inoculum  $\sim 10^7$   
234 CFU) in the presence and absence of *P. aeruginosa* (inoculum  $\sim 10^7$  CFU) for 24 hours.  
235 We found that coinfection with *P. aeruginosa* still increased the burden of *S. maltophilia*  
236 K279a *chpA* in the lung as compared to single-species infection (Fig. 5C). However, this

237 increase was to a lesser degree than with parental *S. maltophilia*, with a 289-fold  
238 increase in *S. maltophilia* burden during coinfection as compared to a 40-fold increase  
239 with *S. maltophilia chpA* (Fig. 5D).

## 240 **Loss of barrier integrity promotes binding of *S. maltophilia* to the bronchial** 241 **epithelium**

242 *P. aeruginosa* harbors many virulence factors that affect lung barrier integrity  
243 during infection, including several secreted proteases (31, 32). Therefore, we  
244 hypothesized that breakdown of tight-junctions, and the resulting depolarization of the  
245 epithelial cell layer, promotes adherence of *S. maltophilia*. Infection of polarized CFBEs  
246 with *P. aeruginosa* (MOI = 20) for 6 hours dramatically decreased organization of  
247 occludin-stained tight junctions as compared to cell culture medium alone (Fig. 6A). The  
248 transepithelial electrical resistance (TEER), a measurement of monolayer polarity, also  
249 decreased significantly over time with the introduction of *P. aeruginosa* ( $P < 0.0001$ )  
250 (Fig. 6B). To determine if the increase in *S. maltophilia* adherence could be induced by  
251 monolayer depolarization in the absence of *P. aeruginosa*, we treated cells with 16 mM  
252 EGTA, a calcium chelator that has been shown to delocalize tight-junction proteins  
253 including occludin and ZO-1 (33, 34). EGTA treatment for 30 minutes successfully  
254 depolarized the epithelial monolayer, with TEER decreasing significantly ( $P < 0.0001$ )  
255 (Fig. 6C). As expected, significantly more *S. maltophilia* adhered to epithelial cells  
256 treated with EGTA as compared to cell culture media controls ( $P < 0.0001$ ). In contrast,  
257 depolarization of the membrane with EGTA did not increase the number of adherent  
258 *chpA*-deficient *S. maltophilia* (Fig. 6D). To determine if *S. maltophilia* bound to the  
259 specific areas of the cell layer with breakdowns in tight-junction integrity, we stained for

260 the tight junction protein ZO-1 and *S. maltophilia* on cell layers with and without EGTA  
261 treatment. Without EGTA, the intercellular tight junctions remained intact and few *S.*  
262 *maltophilia* are present. After pre-treatment with EGTA, the localization of ZO-1 to tight  
263 junctions was diminished, consistent with loss of tight junction integrity and  
264 depolarization of the epithelia. In these infected cells more adherent *S. maltophilia* were  
265 observed, preferentially localized to areas with poor ZO-1 organization (Fig. 6E). Based  
266 on these data we conclude that breakdown of tight junctions is sufficient to promote  
267 colonization with *S. maltophilia* and that *S. maltophilia* is likely binding to host factors  
268 exposed during breakdown of the epithelial barrier rather than to *P. aeruginosa* cellular  
269 or biofilm components.

#### 270 **Elastase-mediated damage to the lung epithelium by *P. aeruginosa* increases *S.*** 271 ***maltophilia* binding**

272 Production of degradative enzymes by *P. aeruginosa* is an important virulence  
273 factor that can interfere with airway barrier integrity and damages host tissue (31, 32,  
274 35). Of these, the secreted protease elastase B is well characterized for its role in  
275 pathogenesis. Elastase B is known break down tight junctions, and therefore depolarize  
276 epithelial and endothelial cell layers. In combination with toxins secreted by the type III  
277 secretion system (T3SS), elastase can also contribute to epithelial invasion and  
278 disseminated infection by *P. aeruginosa* (36).

279 Because we found that tight junction degradation was associated with increased  
280 adherence of *S. maltophilia* to host epithelium (Figure 6), we generated an isogenic *P.*  
281 *aeruginosa* elastase deficient mutant (*P. aeruginosa* mPA08-31 *lasB*) which was used  
282 to test impact of elastase on epithelial integrity and *S. maltophilia* adherence. We

283 infected polarized CFBE epithelia with *P. aeruginosa* mPA08-31 or *P. aeruginosa*  
284 mPA08-31 *lasB*, or mock-infected with cell culture media, for 2 h, 4 h, or 6 h. We then  
285 added *S. maltophilia* K279a, quantified adherent bacteria by viable colony counts, and  
286 monitored change in TEER over time. After 6 h of incubation *P. aeruginosa* promoted *S.*  
287 *maltophilia* adherence to a greater degree than *P. aeruginosa lasB*, despite no  
288 difference in *P. aeruginosa* burden between parental and knockout strains (Fig. 7A, B).  
289 Consistent with these results, *P. aeruginosa* decreased TEER across the epithelial  
290 monolayer to a greater degree than *P. aeruginosa lasB*, although this was not  
291 statistically significant (Fig. 7C). These results were confirmed via confocal imaging of  
292 cell monolayers stained for *S. maltophilia* and tight junctions (ZO-1). More *S. maltophilia*  
293 was present when cells were pre-infected with *P. aeruginosa* mPA08-31 than when  
294 infected with mPA0831 *lasB*. ZO-1 organization was also much better preserved in the  
295 cell layer infected with the *lasB* mutant as compared to the parental *P. aeruginosa* strain  
296 (Fig. 7D). To evaluate the contribution of elastase *in vivo*, we repeated mouse infection  
297 experiments using *P. aeruginosa* and *P. aeruginosa lasB* in conjunction with *S.*  
298 *maltophilia*. The data clearly show that coinfection with *P. aeruginosa* again significantly  
299 increased the *S. maltophilia* bacterial colonization and persistence, but there was no  
300 such impact in mice coinfecting with *S. maltophilia* and *P. aeruginosa lasB* above that of  
301 mice infected with *S. maltophilia* alone (Fig. 7E). *P. aeruginosa lasB* resulted in a 3-fold  
302 increase in *S. maltophilia* burden during coinfection as compared to a 350- fold increase  
303 with the parent strain (Fig. 7F). These results indicate that elastase production by *P.*  
304 *aeruginosa*, and likely the resulting inflammation and lung damage, are necessary  
305 factors for the cooperative behavior of these two organisms in the murine lung.

## 306 DISCUSSION

307 Respiratory infections have significant impacts on morbidity and mortality in  
308 cystic fibrosis and other chronic pulmonary diseases. While many pathogens  
309 responsible for these infections have been identified, the advent of culture-independent  
310 detection methods has led to an appreciation of the complex ecology of the lung and the  
311 impact that inter-species interactions have on patient outcomes. Our prior work showed  
312 that colonization and persistence of *S. maltophilia* in the murine lung was significantly  
313 increased in polymicrobial infections with *P. aeruginosa*. We also demonstrated that this  
314 increased persistence resulted in a higher mortality rate among the infected mice (20).  
315 In the present study, we showed that membrane depolarization and lung damage by *P.*  
316 *aeruginosa* mediates increased binding and persistence of *S. maltophilia* in the murine  
317 lung.

318 Previous metrics of virulence indicated that *P. aeruginosa* infection drives the  
319 host response during polymicrobial infection, and that the response to *S. maltophilia* is  
320 comparatively less severe (20). Our results from RNA-sequencing experiments are  
321 concordant with this finding. Principal component analysis of host gene expression  
322 suggests that infection with *P. aeruginosa* elicited a similar host response to concurrent  
323 infection with both bacterial species. When compared to *S. maltophilia* infection, host  
324 genes involved in both cytokine production and cytokine mediated signaling pathways  
325 were upregulated in polymicrobial infected mice and mice infected with *P. aeruginosa*  
326 alone, indicating a larger magnitude of innate immune response is being mounted when  
327 *P. aeruginosa* is present. Although these two organisms share many cellular structures  
328 able to elicit a strong immune response (endotoxin, flagella, pili, etc.), the ability of *P.*

329 *aeruginosa* to damage the lung epithelium through the release of toxins is likely  
330 contributing to this response. Genes involved in the cell-to-cell adhesion pathway were  
331 also upregulated, indicating a breakdown of barrier integrity.

332 Host-microbe RNA-seq is a powerful technique that allows for a snapshot of  
333 gene expression from both the pathogen and the host in different infection contexts. An  
334 important limitation of this technique is the ability to obtain adequate bacterial reads  
335 from RNA samples that are overwhelmingly made up of host transcripts. For example,  
336 we found that a sequencing depth of ~30 million reads from lung samples of mice  
337 infected with *S. maltophilia* alone yielded on average 0.01% of reads mapping to *S.*  
338 *maltophilia*. To overcome this limitation, we employed a recently published selective  
339 mRNA capture technique known as PatH-Cap (pathogen-hybrid capture), which allows  
340 for pathogen-specific coding sequences to be enriched from a pool of host and non-  
341 coding transcripts (24). For the previously mentioned example that contained 0.01%  
342 bacterial reads, application of PatH-Cap increased bacterial reads to 6.97%, a 697-fold  
343 increase in relative abundance. PatH-Cap was even more effective with RNA samples  
344 from polymicrobial infected mice. The initial bacterial read percentage was 10-fold  
345 higher at 0.10%, and the final read percentage was at ~80%, a 770-fold increase in  
346 relative abundance. This illustrates that PatH-Cap is highly dependent on the  
347 percentage of input bacterial RNA in the pooled RNA sample. Given sufficient starting  
348 material, we have demonstrated that PatH-Cap is a renewable and cost-effective  
349 strategy for investigating bacterial RNA expression in disease-relevant contexts,  
350 overcoming a major limitation in the bacterial pathogenesis field.



351           The *in vivo* bacterial RNA-seq results indicated that genes involved in control and  
352 biogenesis of the type IV pilus are upregulated in the context of polymicrobial infection  
353 in the lung. This included *chpA*, the histidine kinase subunit of a two-component system  
354 that, although largely uncharacterized in *S. maltophilia*, is known to regulate twitching  
355 motility, mechano/chemotaxis, and cAMP regulation in *P. aeruginosa* (25, 30, 37).  
356 Deletion of *chpA* in *S. maltophilia* completely prevented adherence to polarized CFBE  
357 cells. Interestingly, previous reports has shown that both flagella and fimbriae of *S.*  
358 *maltophilia* can mediate adherence to epithelial cells (29, 38, 39). However, this work  
359 was limited to abiotic surfaces, cell lines not derived from pulmonary epithelium, or non-  
360 polarized epithelial layers. Extensive work in *P. aeruginosa* has shown that both flagella  
361 and the type IV pilus can mediate adherence to epithelial cells, but show vastly different  
362 substrate specificity, with the type IV pilus binding preferentially to host N-glycans on  
363 the apical surface of polarized epithelia, and flagella binding preferentially to heparin  
364 sulfate proteoglycans on the basal surface (40). It therefore seems likely that *S.*  
365 *maltophilia*, like *P. aeruginosa*, may use several different adherence mechanisms in a  
366 context-dependent or redundant manner.

367           While we know that *S. maltophilia* and *P. aeruginosa* can cause polymicrobial  
368 infections, this is certainly not the only risk factor for acquisition of *S. maltophilia*.  
369 Decreased lung function, previous antibiotic use, and in-dwelling device all predispose  
370 to *S. maltophilia* infection (41). The results herein, although important for understanding  
371 a polymicrobial interaction, also clarify how a damaged lung environment might be  
372 sufficient to promote *S. maltophilia* binding, as would be the case in patients with late-  
373 stage CF disease. EGTA experiments demonstrate that depolarization of the cell

374 monolayer in the absence of *P. aeruginosa* is sufficient to induce increased *S.*  
375 *maltophilia* adherence. Damage and subsequent depolarization of epithelial membranes  
376 can expose receptors or ligands that allow for more effective pathogen binding and the  
377 role of previous lung damage in establishment of future infection is well characterized  
378 for many other pathogens (42, 43). There is certainly the possibility for other variables  
379 impacting *S. maltophilia* colonization or persistence, including changes in cellular  
380 immune response or nutrient availability. An important next step in this work would be  
381 the identification of the host factor responsible for *S. maltophilia* adherence, particularly  
382 in the context of a damaged lung environment (44).

383         With the advent of effective modulator therapies in CF, patient variables including  
384 the rapid decline in lung function and persistent inflammation associated with chronic  
385 infection with chronic infections may be changing. As with most opportunistic airway  
386 infections, CF related respiratory infections are polymicrobial in nature and there is  
387 potential for interspecies influences on colonization and persistence in the respiratory  
388 tract. With regard to *S. maltophilia*, our findings demonstrate that preceding or  
389 coinciding infections may be major determinants of infection outcomes.

390

## 391 **MATERIALS AND METHODS**

### 392 **Strains and growth conditions**

393 *S. maltophilia* K279a is a widely used model strain with a fully annotated genome  
394 sequence, originally isolated from a patient with bacteremia in the UK (11); this strain  
395 and the *S. maltophilia* K279a-GFP derivative were provided by M. Herman (Kansas  
396 State University). *P. aeruginosa* mPA08-31 was originally isolated from the sputum of a  
397 patient with CF and was provided by S. Birket (University of Alabama at Birmingham).  
398 *P. aeruginosa* mPA08-31-mCherry+ was constructed by transforming parent strains with  
399 plasmid pUCP19+mCherry provided by D. Wozniak (Ohio State University). All strains  
400 were routinely cultured on Luria Bertani (LB) agar (Difco) or in LB broth. *S. maltophilia*  
401 strains were streaked for colony isolation before inoculating into LB broth and shaking  
402 overnight at 30°C, 200 rpm. *P. aeruginosa* strains were streaked for colony isolation  
403 before inoculating into LB broth and shaking overnight at 37°C, 200 rpm.

### 404 **Mouse respiratory infections**

405 BALB/cJ mice (8-10 weeks old) were obtained from Jackson laboratories (Bar Harbor,  
406 ME). Mice were anesthetized with isoflurane and intratracheally infected with either *S.*  
407 *maltophilia*, *P. aeruginosa*, or both ( $\sim 10^7$  CFU each in 100  $\mu$ L PBS). Mice were  
408 euthanized 24 hours post-infection and the left lung of each mouse was harvested and  
409 homogenized in 500  $\mu$ L of sterile PBS for viable plate counting. Homogenate from  
410 single-species infections was serially diluted in PBS and plated on LB to obtain viable  
411 CFU counts. Homogenate from polymicrobial infections were plated on M9 minimal  
412 medium (45) to enumerate *P. aeruginosa* and LB agar containing gentamicin (50

413  $\mu\text{g/mL}$ ) to enumerate *S. maltophilia*. All samples from polymicrobial infections were also  
414 plated on LB for total bacterial counts. All mouse infection protocols were approved by  
415 the UAB Institutional Animal Care and Use Committees.

#### 416 **RNA library preparation**

417 For RNA isolation from the lung, BALB/cJ mice (8-10 weeks old) were obtained from  
418 Jackson laboratories (Bar Harbor, ME). Mice were anesthetized with isoflurane and  
419 intratracheally infected with either *S. maltophilia*, *P. aeruginosa*, or both ( $\sim 10^7$  CFU each  
420 in 100  $\mu\text{L}$  PBS). Mice were euthanized 24 hours post-infection, and lungs were inflated  
421 with RNA-later to preserve RNA integrity. Whole lungs were homogenized, and cells  
422 were lysed by bead beating (0.1 mm silica) in Trizol reagent (Invitrogen), and a full lung  
423 RNA extraction was performing using a standard protocol (46). Extracted RNA samples  
424 were sent to GENEWIZ (South Plainfield, NJ) for DNase treatment, host and bacterial  
425 rRNA depletion (Ribo-Zero Gold rRNA Removal Kit (Epidemiology), Illumina), and  
426 library preparation using standard protocols. For bacterial RNA-seq, single-end  
427 directional samples were DNase treated (DNase I, NEB) using a standard protocol,  
428 before being run through a second Trizol extraction to purify the sample of enzyme.  
429 Clean RNA was first rRNA depleted using the NEBNext rRNA depletion kit  
430 (Human/Mouse/Rat) (NEB) before being prepared for sequencing using the NEBNext  
431 Ultra II Directional RNA Library Prep Kit (NEB) and tagged for multiplexing via the NE  
432 Next Multiplex Oligos for Illumina (NEB).

#### 433 **Pathogen-Hybrid Capture**

434 A pathogen-specific probe list for *S. maltophilia* was generated using previously  
435 published methods (24). Briefly, 100 bp probes were generated to cover annotated  
436 coding sequences of *S. maltophilia*, with 15 bp spacer sequences added on either end  
437 to allow for amplification of the probe library.

438 5' SPACER : ATCGCACCAGCGTGT

439 3' SPACER: CACTGCGGCTCCTCA

440 Probes completely covered the sense strand of each gene and were also generated to  
441 tile every other 100 bp of the antisense strand for a total of 68,704 probe sequences  
442 (Figure S1). Probes with significant homology to the mouse genome or to bacterial non-  
443 coding RNAs ( $P < 0.05$  with BLAST analysis) were manually removed from the list. The  
444 resulting oligo pool was synthesized by Genscript (Piscataway, NJ). Before  
445 hybridization, DNA oligos were amplified and then reverse transcribed  
446 (MEGAscript T7 Transcription Kit, Ambion), with added biotin-16-UTP (Roche) to  
447 generate biotinylated RNA probes.

448 Prepared cDNA libraries were hybridized to the generated pathogen-specific RNA  
449 probes using previously described methods (24) with a few modifications. Briefly, the  
450 synthesized probes and the prepared cDNA library were incubated in hybridization  
451 buffer for 24 hours at 68°C. Blocking primers were modified for compatibility with NEB  
452 multiplexing primers and a 3' ddc' modification was added to maintain barcoding.

453 Hybridization primer FWD:

454 AATGATACGGCGACCACCGAGATCTACACTCTTTCCCTACACGACGCTCTTCCGAT

455 CT/3ddC/

456 Hybridization primer REV:

457 CAAGCAGAAGACGGCATAACGAGATNNNNNNNNGTGACTGGAGTTCAGACGTGTGC

458 TCTTCCGATCT/3ddC/

459 Mouse cot-1 DNA was also swapped for human cot-1 DNA in the hybridization buffer to  
460 account for host differences. Hybridized cDNA was isolated via streptavidin beads and  
461 then eluted. A diagnostic qPCR (Kapa library quantification kit, Roche) was used to  
462 determine the appropriate number of amplification cycles, and enriched samples were  
463 amplified using universal primers that maintained sample barcoding before sequencing.  
464 All primers used in these experiments are detailed in the supplemental material (Table  
465 S3).

#### 466 **Sequencing, Alignment and Analysis**

467 For host RNA-seq, paired-end strand-specific RNA sequencing was performed using an  
468 Illumina HiSeq2 with ~25,000,000 reads per sample. Reads were trimmed with Trim  
469 Galore! (v. 0.4.4) and Cutadapt (v. 1.9.1) and evaluated for quality with FastQC. Reads  
470 were aligned to the mouse transcriptome generated from Ensembl gene annotations  
471 (build GRCm39/mm39) using the STAR aligner (v. 2.7.3a). Read counts were obtained  
472 via Subread FeatureCounts and differential expression analysis was performed with  
473 DESeq2, with a  $\hat{p}$ -value cutoff of  $< 0.01$ . Pathway analysis was performed using  
474 clusterProfiler (v. 4.4.1) with Gene Ontology (biological processes) and KEGG pathway  
475 databases.

476 Single-end strand-specific sequencing was performed on samples enriched for  
477 pathogen-specific RNA via hybridization (~30,000,000 reads/sample) via Illumina

478 NextSeq500. These reads were again trimmed with Trim Galore! (v. 0.4.4) and  
479 Cutadapt (v. 1.9.1) and evaluated for quality with FastQC. Reads were aligned to the  
480 published genome of *S. maltophilia* K279a using the STAR aligner (v. 2.7.3a). Read  
481 counts were obtained via Subread FeatureCounts and differential expression analysis  
482 was performed with DESeq2. Final analysis of significantly up- and down-regulated  
483 genes from *S. maltophilia* in the context of polymicrobial infection was restricted to  
484 those genes with transcripts detected in at least 2/4 samples from each group.

#### 485 **Cell culture**

486 Cystic fibrosis bronchial epithelial cells (CFBE41o-) cells, henceforth referred to as  
487 CFBEs, are an immortalized human bronchial epithelial cell line homologous for the  
488 F508del mutation in CFTR (47) and were propagated from low-passage liquid nitrogen  
489 stocks in the Cell Model and Evaluation core laboratory in the UAB Center for Cystic  
490 Fibrosis Research. Cells were routinely cultured in minimal essential medium (MEM,  
491 Corning) with 10% fetal bovine serum, and were polarized by seeding at a density of  
492  $\sim 10^6$  cells/well on the apical surface of transwells (0.4  $\mu\text{m}$ , Corning) and growing at  
493 37°C for 7 days, before removing the apical media and growing for an additional 7 days  
494 at air-liquid interface. Polarization of the epithelial membranes was confirmed via  
495 transepithelial electrical resistance measurements performed via EVOM<sup>2</sup> Volt/Ohm  
496 Meter (World Precision Instruments).

#### 497 **Adherence assays**

498 To measure the adherence of *S. maltophilia* to CFBEs after prior infection with *P.*  
499 *aeruginosa*, cells were inoculated with  $\sim 10^6$  CFUs (MOI = 20) of *P. aeruginosa* mPA08-

500 31 in MEM (no FBS). The media on the basal side of the chamber was also replaced  
501 with FBS-free medium before incubation. Bacteria were incubated on the cells for 2 h, 4  
502 h, or 6 h before being removed from the apical chamber. Cells were then inoculated  
503 with  $\sim 10^6$  CFUs (MOI = 20) of *S. maltophilia* K279a and incubated for an hour. Cells  
504 were washed twice with sterile PBS before being scraped from the transwell membrane,  
505 diluted, and plated on differential medium to enumerate the bacterial burden. TEER was  
506 measured for each well both before infection and at the end of *P. aeruginosa* mPA-0831  
507 infection at each time point specified.

508 For EGTA exposure experiments, cells were treated apically with plain MEM or MEM  
509 with 16 mM EGTA 30 minutes at 37°C. Media was then removed and cells were  
510 inoculated with  $\sim 10^6$  CFUs (MOI = 20) of *S. maltophilia* and incubated for an hour.  
511 Bacteria were enumerated by plate count as described above.

## 512 **Immunofluorescence Staining and Confocal Microscopy**

513 For imaging of polymicrobial infections, cell layers were infected as described above  
514 with *P. aeruginosa* mPA08-31 (mCherry+) and *S. maltophilia* K279a (gfp+) or K279a  
515 *chpA* (gfp+). Cells were fixed with 4% paraformaldehyde overnight at 4°C. Cells were  
516 then rehydrated with PBS and stained with DAPI. Filters were mounted with ProLong  
517 Diamond Antifade (Invitrogen) and were imaged using z-stacks via confocal laser  
518 scanning microscopy (CLSM) using a 60X objective.

519 For imaging of tight-junctions, cells were stained via immunofluorescence. Cells were  
520 fixed as previously described, with a few modifications (48). In brief, cells were fixed in  
521 1:1 acetone methanol at 20°C for 10 minutes before rehydrating in TBS. Cell layers



522 were blocked with TBS + 3% BSA for 30 minutes before staining. Cells were incubated  
523 with primary antibody (rabbit polyclonal  $\alpha$ -occludin, or donkey  $\alpha$ -goat ZO-1 for tight  
524 junctions, and polyclonal  $\alpha$ -*Smlt* rabbit sera cross adsorbed against *P. aeruginosa* for  
525 staining of *S. maltophilia*) for 1 hour at room temperature. Filters were then washed and  
526 incubated with secondary antibody for 1 hour at room temperature, before being stained  
527 with DAPI and mounted with ProLong Diamond Antifade (Invitrogen). Filters were again  
528 imaged using z-stacks via confocal laser scanning microscopy (CLSM) using a 60X  
529 objective. For insets, images were zoomed in 2X for a total magnification of 120X.  
530 CLSM was performed using a Nikon-A1R HD25 Confocal Laser Microscope (Nikon,  
531 Tokyo, Japan). Images were acquired and processed using the NIS-elements 5.0  
532 software.

### 533 **Bacterial deletion mutants**

534 An unmarked isogenic deletion mutant of *Smlt3670* (*chpA*) in *S. maltophilia* was  
535 produced via two-step homologous recombination as has been previously described for  
536 *P. aeruginosa* (49). DNA fragments of 500-1000bp upstream and downstream of each  
537 gene were inserted in pEX18Tc using the Gibson Assembly Cloning Kit (NEB) using  
538 standard protocols from the manufacturer. Plasmids were transformed into *E. coli* DH5 $\alpha$   
539 before introduction into *S. maltophilia* K279a via triparental conjugation with helper  
540 strain PRK2013 as previously described (50). Clean deletion was confirmed by PCR  
541 amplification of the designated region. The unmarked deletion mutant of *lasB* in *P.*  
542 *aeruginosa* mPA08-31 was produced using the methods detailed above, but with a  
543 pEX18Gm backbone. For each mutant in *S. maltophilia* or *P. aeruginosa*, at least two

544 independently derived mutants were evaluated and whole genome sequencing was  
545 performed showing a lack of secondary mutations.

### 546 **Statistical analyses**

547 Unless otherwise noted, graphs represent sample means  $\pm$  SEM. For non-parametric  
548 analyses, differences between groups were analyzed by Kruskal-Wallis test with the  
549 uncorrected Dunn's test for multiple comparisons. For normally distributed data sets (as  
550 determined by Shapiro-Wilk normality test) a one-way ANOVA was used with Tukey's  
551 multiple comparisons test. For analyses with more than one factor, a Two-way ANOVA  
552 was used. All statistical tests were performed using Graphpad Prism 9 (San Diego, CA).

### 553 **DATA AVAILABILITY**

554 Sequencing data generated for all samples included in this study are deposited in the  
555 NCBI Sequence Read Archive under the BioProject ID PRJNA853083. Accession  
556 numbers for individual sample sequencing read libraries are provided in the  
557 supplementary information.

558

559 **ACKNOWLEDGMENTS**

560 This work was supported by grants from the Cystic Fibrosis Foundation  
561 (CFFSWORDS1810 and CFFSWORDS20G0) awarded to W.E.S. as well as NIH P30  
562 center grant DK072482 awarded to Dr. Steve Rowe. M.S.M. was supported by an  
563 NHBLI T32 UAB pre-doctoral training program in lung diseases (T32HL134640, W.E.S.  
564 PI) and as a trainee on the UAB CF Research and Development Program (CFF-  
565 ROWE19RO).

566 The authors thank Shawn Williams and Robert Grabski at the UAB High Resolution  
567 Imaging Facility for their assistance with the Nikon A1 Confocal microscope and  
568 imaging analysis. We also thank Cristina Penaranda (Harvard University), Dr. Michael  
569 Crowley (University of Alabama at Birmingham) and the UAB Heflin Genetics core for  
570 helping with sequencing, experimental design, and for lending their expertise with  
571 regards to the Path-Cap and RNA sequencing experiments. Megan Kiedrowski  
572 provided valuable feedback on the manuscript during revision. We Dr. Bill Benjamin  
573 (University of Alabama at Birmingham), Dr. Daniel Wozniak (Ohio State University), Dr.  
574 Jessica Scoffield (The University of Alabama at Birmingham), and Dr. Susan Birket (The  
575 University of Alabama at Birmingham) provided bacterial strains for this study.

576

577 **FIGURE LEGENDS**

578 **FIG 1. The host inflammatory response following polymicrobial infection is driven**  
579 **by *P. aeruginosa***

580 BALB/cJ mice were intratracheally infected with  $\sim 10^7$  CFU of *S. maltophilia* K279a and  
581 *P. aeruginosa* mPA08-31 alone, and in combination. Groups were euthanized at 24  
582 hours post-infection. A) Bacterial load in lung homogenate was enumerated via viable  
583 colony counting on differential medium (mean  $\pm$  SEM, n = 9-10; Kruskal-Wallis with  
584 Dunn's multiple comparisons, \*  $P < 0.05$ ). Using the same infection scheme, whole-lung  
585 RNA was extracted and sequenced (n=5). B) Principal component analysis of samples  
586 based on RNA-sequencing data, colored by infection group. C) A Venn-diagram  
587 depicting the number of significantly differentially expressed genes between groups as  
588 determined via differential-expression analysis using DESeq2. D) Pathway analysis of  
589 differentially expressed genes performed via clusterProfiler using GeneOntology  
590 (biological function) (left) and KEGG pathway databases (right). The top 20 differentially  
591 regulated pathways (10 most enriched by positively expressed genes and 10 most  
592 enriched by negatively expressed genes) are represented for each comparison.

593

594 **FIG 2. RNA isolation and sequencing methodology**

595 A schematic depicting the workflow of host-pathogen RNA seq using pathogen-hybrid  
596 capture (PathH-cap). BALB/cJ mice were intratracheally infected with  $\sim 10^7$  CFU of *S.*  
597 *maltophilia* K279a and *P. aeruginosa* mPA08-31 alone, and in combination, and groups  
598 were euthanized at 24 hours post-infection. For host RNA-sequencing, whole-lung RNA  
599 was extracted, depleted of host rRNA, and then prepared for sequencing. For bacterial  
600 RNA-sequencing, a pathogen-specific probe set was generated to cover coding  
601 sequences of *S. maltophilia* K279a. This pool of DNA probes was synthesized,  
602 amplified, and then reverse transcribed to create biotinylated RNA probes. Prepared  
603 cDNA libraries from the whole lung preparations were hybridized to pathogen-specific  
604 probes, and the enriched RNA population was isolated via streptavidin-bead binding.  
605 Pathogen-enriched libraries were then sequenced to obtain a bacterial transcript profile.

606

607 **FIG 3. *S. maltophilia* upregulates genes associated with adhesion and chemotaxis**  
608 **in the context of polymicrobial infection**

609 Pathogen-enriched RNA was extracted as detailed above and sequenced (n=4). A)  
610 Principal component analysis of samples based on bacterial-specific RNA-sequencing  
611 data, colored by infection group. B) Top 5 most significantly up- and down-regulated *S.*  
612 *maltophilia* genes during co-infection in the lung as compared to single-species  
613 infection, determined via DESeq2. Genes with reads detected in less than half of the  
614 samples for each group were excluded from this analysis. *P* adj. indicates the  
615 significance value after multiple testing corrections. C) A schematic depicting the  
616 proposed type IV pilus system of *S. maltophilia* (27, 51, 52) and the corresponding  
617 differential expression values for each gene. Loci are represented as annotated in *S.*  
618 *maltophilia* K279a (11). Genes significantly upregulated during dual species infection  
619 are highlighted in color for each locus.

620

621 **FIG 4. Pre-exposure of epithelial cells to *P. aeruginosa* promotes adherence of *S.***

622 ***maltophilia***

623 Immortalized cystic fibrosis bronchial epithelial cells (CFBEs) were grown at air-liquid  
624 interface until polarized. A) Infection schematic depicting the pre-treatment of with either  
625 EMEM or  $\sim 10^6$  CFU of *P. aeruginosa* mPA08-31 for 2, 4, or 6 hours before the addition  
626 of  $\sim 10^6$  *S. maltophilia* K279a for 1 hour. B) Viable colony counts of adherent *S.*  
627 *maltophilia* K279a (Mean  $\pm$  SEM, n = 15 wells. Two-way ANOVA, \*\*\*\* P<0.0001) or C)  
628 *P. aeruginosa* mPA08-31 (Mean  $\pm$  SEM, n = 15 wells). D) Structural composition of  
629 polymicrobial foci as evaluated via confocal microscopy. Infections were repeated with  
630 *S. maltophilia* K279a (gfp+) and *P. aeruginosa* mPA08-31 (mCherry+), and CFBEs were  
631 visualized with DAPI. Polymicrobial foci were imaged at 60X magnification.

632

633 **FIG 5. Dysregulation of the type IV pilus abrogates promotion of *S. maltophilia***  
634 **adherence**

635 Polarized CFBEs were infected  $\sim 10^6$  CFU of *P. aeruginosa* mPA08-31 or vehicle  
636 (MEM) for 2 h, 4 h, or 6 h before infection with  $\sim 10^6$  *S. maltophilia* K279a or K279a *chpA*  
637 for 1 h. A) Viable colony counts of adherent *S. maltophilia* (Mean  $\pm$  SEM, n = 9 wells.  
638 Two-way ANOVA, \*\*\*\* P<0.0001). B) Structural composition of polymicrobial foci as  
639 evaluated via confocal microscopy. Infections were repeated with *S. maltophilia* K279a  
640 (*gfp+*) or K279a *chpA* (*gfp+*) and *P. aeruginosa* mPA08-31 (*mCherry+*), and CFBEs  
641 were visualized with DAPI. Polymicrobial foci were imaged at 60X magnification.  
642 BALB/cJ mice were intratracheally infected with  $\sim 10^8$  CFU of *S. maltophilia* K279a or  
643 K279a *chpA* in the presence and absence of *P. aeruginosa* mPA08-31 and were  
644 euthanized 24-hours post-infection. C) Bacterial burden in the lung enumerated via  
645 viable colony counting from lung homogenate (Mean  $\pm$  SEM, n = 9-20. Kruskal-Wallis,  
646 \*\*\* P<0.001). D) Fold change in bacterial counts between single-species and  
647 polymicrobial infections.

648



649 **FIG 6. Depolarization of the epithelia is sufficient to promote adherence of *S.***

650 ***maltophilia***

651 A) Confocal imaging of tight junctions stained via immunofluorescent staining for occludin  
652 from cells treated with either EMEM or  $\sim 10^6$  CFU of *P. aeruginosa*. Cells were imaged at  
653 60X magnification. B) Percent change in transepithelial electrical resistance (TEER)  
654 across the epithelial membrane after addition of MEM or  $\sim 10^6$  CFU of *P. aeruginosa*  
655 (Mean  $\pm$  SEM, n = 6 wells. Two-way ANOVA, \*\*\* P<0.001). C) Percent change in TEER  
656 across the epithelial membrane after addition of MEM or 16 mM EGTA for 30 minutes.  
657 (Mean  $\pm$  SEM, n = 20 wells. Unpaired t-test, \*\*\*\* P<0.0001). D) Viable colony counts of  
658 adherent *S. maltophilia* K279a and K279a *chpA* on CFBEs after a 30-minute pre-  
659 treatment with either MEM or EGTA (16 mM) (Mean  $\pm$  SEM, n = 12 wells. One-way  
660 ANOVA, \*\*\*\* P<0.0001). E) Confocal imaging of CFBEs pre-treated with either MEM  
661 (left) or 16 mM EGTA (right) before *S. maltophilia* inoculation. Cells were stained via  
662 ZO-1 (red) for tight junctions and *S. maltophilia* via anti-*Smlt* rabbit sera (green) and  
663 were imaged at 60X magnification. Inserts were zoomed in 2X for a total magnification  
664 of 120X.

665

666 **FIG 7. Elastase production by *P. aeruginosa* promotes increased persistence of *S.***  
667 ***maltophilia* in the murine lung**

668 Polarized CFBEs were pre-treated with MEM,  $\sim 10^6$  CFU of *P. aeruginosa* mPA08-31 or  
669  $\sim 10^6$  CFU of *P. aeruginosa* mPA08-31 *lasB* for 2, 4, or 6 hours before the addition of *S.*  
670 *maltophilia* K279a for 1 hour. A) Viable colony counts of adherent *S. maltophilia* or B) *P.*  
671 *aeruginosa* (Mean  $\pm$  SEM, n = 8 wells. Two-way ANOVA, \* P<0.05). C) Percent change  
672 in TEER across the epithelial membrane after addition of MEM, mPA08-31, or mPA08-  
673 31 *lasB* (Mean  $\pm$  SEM, n = 8 wells. Two-way ANOVA, \*\* P<0.01, \*\*\*\* P<0.0001). D)  
674 Confocal imaging of CFBE41s pre-treated with either WT or elastase deficient *P.*  
675 *aeruginosa* before *S. maltophilia* inoculation. Cells were stained via ZO-1 (red) for tight  
676 junctions and *S. maltophilia* via anti-*Smlt* rabbit sera (green) and were imaged at 60X  
677 magnification. Inserts were zoomed in 2X for a total magnification of 120X. BALB/cJ  
678 mice were intratracheally infected with  $\sim 10^8$  CFU of *S. maltophilia* K279a alone or in the  
679 presence *P. aeruginosa* mPA08-31 or mPA08-31 *lasB* and were euthanized 24-hours  
680 post-infection. E) Bacterial burden in the lung enumerated via viable colony counting  
681 from lung homogenate. (Mean  $\pm$  SEM, n = 7-10. Kruskal-Wallis, \* P<0.05, \*\* P<0.01). F)  
682 Fold change in bacterial counts between single-species and polymicrobial infections.

683 **Literature Cited**

- 684 1. Denton M, Todd NJ, Kerr KG, Hawkey PM, Littlewood JM. 1998. Molecular epidemiology  
685 of *Stenotrophomonas maltophilia* isolated from clinical specimens from patients with  
686 cystic fibrosis and associated environmental samples. *J Clin Microbiol* 36:1953-8.
- 687 2. Denton M, Rajgopal A, Mooney L, Qureshi A, Kerr KG, Keer V, Pollard K, Peckham DG,  
688 Conway SP. 2003. *Stenotrophomonas maltophilia* contamination of nebulizers used to  
689 deliver aerosolized therapy to inpatients with cystic fibrosis. *J Hosp Infect* 55:180-3.
- 690 3. Berg G, Eberl L, Hartmann A. 2005. The rhizosphere as a reservoir for opportunistic  
691 human pathogenic bacteria. *Environ Microbiol* 7:1673-85.
- 692 4. Yorioka K, Oie S, Kamiya A. 2010. Microbial contamination of suction tubes attached to  
693 suction instruments and preventive methods. *Jpn J Infect Dis* 63:124-7.
- 694 5. Guerci P, Bellut H, Mokhtari M, Gaudefroy J, Mongardon N, Charpentier C, Louis G,  
695 Tashk P, Dubost C, Ledochowski S, Kimmoun A, Godet T, Pottecher J, Lalot JM, Novy  
696 E, Hajage D, Bouglé A. 2019. Outcomes of *Stenotrophomonas maltophilia* hospital-  
697 acquired pneumonia in intensive care unit: a nationwide retrospective study. *Crit Care*  
698 23:371.
- 699 6. Behnia M, Logan SC, Fallen L, Catalano P. 2014. Nosocomial and ventilator-associated  
700 pneumonia in a community hospital intensive care unit: a retrospective review and  
701 analysis. *BMC Res Notes* 7:232.
- 702 7. Su L, Qiao Y, Luo J, Huang R, Li Z, Zhang H, Zhao H, Wang J, Xiao Y. 2022.  
703 Characteristics of the sputum microbiome in COPD exacerbations and correlations  
704 between clinical indices. *J Transl Med* 20:76.
- 705 8. Foundation CF. 2020. Cystic Fibrosis Foundation Patient Registry, Bethesda, MD.

- 706 9. Goss CH, Mayer-Hamblett N, Aitken ML, Rubenfeld GD, Ramsey BW. 2004. Association  
707 between *Stenotrophomonas maltophilia* and lung function in cystic fibrosis. *Thorax*  
708 59:955-9.
- 709 10. Dalbøge CS, Hansen CR, Pressler T, Høiby N, Johansen HK. 2011. Chronic pulmonary  
710 infection with *Stenotrophomonas maltophilia* and lung function in patients with cystic  
711 fibrosis. *J Cyst Fibros* 10:318-25.
- 712 11. Crossman LC, Gould VC, Dow JM, Vernikos GS, Okazaki A, Sebahia M, Saunders D,  
713 Arrowsmith C, Carver T, Peters N, Adlem E, Kerhornou A, Lord A, Murphy L, Seeger K,  
714 Squares R, Rutter S, Quail MA, Rajandream MA, Harris D, Churcher C, Bentley SD,  
715 Parkhill J, Thomson NR, Avison MB. 2008. The complete genome, comparative and  
716 functional analysis of *Stenotrophomonas maltophilia* reveals an organism heavily  
717 shielded by drug resistance determinants. *Genome Biol* 9:R74.
- 718 12. Klockgether J, Cramer N, Wiehlmann L, Davenport CF, Tümmler B. 2011.  
719 *Pseudomonas aeruginosa* Genomic Structure and Diversity. *Front Microbiol* 2:150.
- 720 13. Gonçalves-de-Albuquerque CF, Silva AR, Burth P, Rocco PR, Castro-Faria MV, Castro-  
721 Faria-Neto HC. 2016. Possible mechanisms of *Pseudomonas aeruginosa*-associated  
722 lung disease. *Int J Med Microbiol* 306:20-8.
- 723 14. Tseng CC, Fang WF, Huang KT, Chang PW, Tu ML, Shiang YP, Douglas IS, Lin MC.  
724 2009. Risk factors for mortality in patients with nosocomial *Stenotrophomonas*  
725 *maltophilia* pneumonia. *Infect Control Hosp Epidemiol* 30:1193-202.
- 726 15. Yin C, Yang W, Meng J, Lv Y, Wang J, Huang B. 2017. Co-infection of *Pseudomonas*  
727 *aeruginosa* and *Stenotrophomonas maltophilia* in hospitalised pneumonia patients has a  
728 synergic and significant impact on clinical outcomes. *Eur J Clin Microbiol Infect Dis*  
729 36:2231-2235.

- 730 16. Yang S, Hua M, Liu X, Du C, Pu L, Xiang P, Wang L, Liu J. 2021. Bacterial and fungal  
731 co-infections among COVID-19 patients in intensive care unit. *Microbes Infect*  
732 23:104806.
- 733 17. Chong WH, Saha BK, Ananthakrishnan R, Chopra A. 2021. State-of-the-art review of  
734 secondary pulmonary infections in patients with COVID-19 pneumonia. *Infection* 49:591-  
735 605.
- 736 18. Pompilio A, Crocetta V, De Nicola S, Verginelli F, Fiscarelli E, Di Bonaventura G. 2015.  
737 Cooperative pathogenicity in cystic fibrosis: *Stenotrophomonas maltophilia* modulates  
738 *Pseudomonas aeruginosa* virulence in mixed biofilm. *Front Microbiol* 6:951.
- 739 19. Bottery MJ, Matthews JL, Wood AJ, Johansen HK, Pitchford JW, Friman VP. 2022.  
740 Inter-species interactions alter antibiotic efficacy in bacterial communities. *Isme j* 16:812-  
741 821.
- 742 20. McDaniel MS, Schoeb T, Swords WE. 2020. Cooperativity between *Stenotrophomonas*  
743 *maltophilia* and *Pseudomonas aeruginosa* during Polymicrobial Airway Infections. *Infect*  
744 *Immun* 88.
- 745 21. Yu G, Wang LG, Han Y, He QY. 2012. clusterProfiler: an R package for comparing  
746 biological themes among gene clusters. *Omics* 16:284-7.
- 747 22. Lin CK, Kazmierczak BI. 2017. Inflammation: A Double-Edged Sword in the Response to  
748 *Pseudomonas aeruginosa* Infection. *J Innate Immun* 9:250-261.
- 749 23. Kuek LE, Lee RJ. 2020. First contact: the role of respiratory cilia in host-pathogen  
750 interactions in the airways. *Am J Physiol Lung Cell Mol Physiol* 319:L603-l619.
- 751 24. Betin V, Penaranda C, Bandyopadhyay N, Yang R, Abitua A, Bhattacharyya RP, Fan A,  
752 Avraham R, Livny J, Shores N, Hung DT. 2019. Hybridization-based capture of  
753 pathogen mRNA enables paired host-pathogen transcriptional analysis. *Sci Rep*  
754 9:19244.

- 755 25. Bertrand JJ, West JT, Engel JN. 2010. Genetic analysis of the regulation of type IV pilus  
756 function by the Chp chemosensory system of *Pseudomonas aeruginosa*. *J Bacteriol*  
757 192:994-1010.
- 758 26. Tammam S, Sampaleanu LM, Koo J, Manoharan K, Daubaras M, Burrows LL, Howell  
759 PL. 2013. PilMNOPQ from the *Pseudomonas aeruginosa* type IV pilus system form a  
760 transenvelope protein interaction network that interacts with PilA. *J Bacteriol* 195:2126-  
761 35.
- 762 27. V K, Neela VK. 2020. Twitching motility of *Stenotrophomonas maltophilia* under iron  
763 limitation: In-silico, phenotypic and proteomic approaches. *Virulence* 11:104-112.
- 764 28. Masduki A, Nakamura J, Ohga T, Umezaki R, Kato J, Ohtake H. 1995. Isolation and  
765 characterization of chemotaxis mutants and genes of *Pseudomonas aeruginosa*. *J*  
766 *Bacteriol* 177:948-52.
- 767 29. Pompilio A, Crocetta V, Confalone P, Nicoletti M, Petrucca A, Guarnieri S, Fiscarelli E,  
768 Savini V, Piccolomini R, Di Bonaventura G. 2010. Adhesion to and biofilm formation on  
769 IB3-1 bronchial cells by *Stenotrophomonas maltophilia* isolates from cystic fibrosis  
770 patients. *BMC Microbiol* 10:102.
- 771 30. Whitchurch CB, Leech AJ, Young MD, Kennedy D, Sargent JL, Bertrand JJ, Semmler  
772 AB, Mellick AS, Martin PR, Alm RA, Hobbs M, Beatson SA, Huang B, Nguyen L,  
773 Commolli JC, Engel JN, Darzins A, Mattick JS. 2004. Characterization of a complex  
774 chemosensory signal transduction system which controls twitching motility in  
775 *Pseudomonas aeruginosa*. *Mol Microbiol* 52:873-93.
- 776 31. Azghani AO, Miller EJ, Peterson BT. 2000. Virulence factors from *Pseudomonas*  
777 *aeruginosa* increase lung epithelial permeability. *Lung* 178:261-9.
- 778 32. Döring G, Goldstein W, Röhl A, Schiøtz PO, Høiby N, Botzenhart K. 1985. Role of  
779 *Pseudomonas aeruginosa* exoenzymes in lung infections of patients with cystic fibrosis.  
780 *Infect Immun* 49:557-62.

- 781 33. Walters RW, Grunst T, Bergelson JM, Finberg RW, Welsh MJ, Zabner J. 1999.  
782 Basolateral localization of fiber receptors limits adenovirus infection from the apical  
783 surface of airway epithelia. *J Biol Chem* 274:10219-26.
- 784 34. Rothen-Rutishauser B, Riesen FK, Braun A, Günthert M, Wunderli-Allenspach H. 2002.  
785 Dynamics of tight and adherens junctions under EGTA treatment. *J Membr Biol* 188:151-  
786 62.
- 787 35. Cigana C, Castandet J, Sprynski N, Melessike M, Beyria L, Ranucci S, Alcalá-Franco B,  
788 Rossi A, Bragonzi A, Zalacain M, Everett M. 2020. *Pseudomonas aeruginosa* Elastase  
789 Contributes to the Establishment of Chronic Lung Colonization and Modulates the  
790 Immune Response in a Murine Model. *Front Microbiol* 11:620819.
- 791 36. Golovkine G, Faudry E, Bouillot S, Voulhoux R, Attrée I, Huber P. 2014. VE-cadherin  
792 cleavage by LasB protease from *Pseudomonas aeruginosa* facilitates type III secretion  
793 system toxicity in endothelial cells. *PLoS Pathog* 10:e1003939.
- 794 37. Fulcher NB, Holliday PM, Klem E, Cann MJ, Wolfgang MC. 2010. The *Pseudomonas*  
795 *aeruginosa* Chp chemosensory system regulates intracellular cAMP levels by  
796 modulating adenylate cyclase activity. *Mol Microbiol* 76:889-904.
- 797 38. al. DdO-Ge. 2003. Fimbriae and adherence of *Stenotrophomonas maltophilia* to  
798 epithelial cells and to abiotic surfaces. *Cellular Microbiology* 5:625-636.
- 799 39. Pompilio A, Piccolomini R, Picciani C, D'Antonio D, Savini V, Di Bonaventura G. 2008.  
800 Factors associated with adherence to and biofilm formation on polystyrene by  
801 *Stenotrophomonas maltophilia*: the role of cell surface hydrophobicity and motility. *FEMS*  
802 *Microbiol Lett* 287:41-7.
- 803 40. Bucior I, Pielage JF, Engel JN. 2012. *Pseudomonas aeruginosa* pili and flagella mediate  
804 distinct binding and signaling events at the apical and basolateral surface of airway  
805 epithelium. *PLoS Pathog* 8:e1002616.

- 806 41. Stanojevic S, Ratjen F, Stephens D, Lu A, Yau Y, Tullis E, Waters V. 2013. Factors  
807 influencing the acquisition of *Stenotrophomonas maltophilia* infection in cystic fibrosis  
808 patients. *J Cyst Fibros* 12:575-83.
- 809 42. Park SS, Gonzalez-Juarbe N, Riegler AN, Im H, Hale Y, Platt MP, Croney C, Briles DE,  
810 Orihuela CJ. 2021. *Streptococcus pneumoniae* binds to host GAPDH on dying lung  
811 epithelial cells worsening secondary infection following influenza. *Cell Rep* 35:109267.
- 812 43. Melvin JA, Bomberger JM. 2016. Compromised Defenses: Exploitation of Epithelial  
813 Responses During Viral-Bacterial Co-Infection of the Respiratory Tract. *PLoS Pathog*  
814 12:e1005797.
- 815 44. Bucior I, Abbott J, Song Y, Matthay MA, Engel JN. 2013. Sugar administration is an  
816 effective adjunctive therapy in the treatment of *Pseudomonas aeruginosa* pneumonia.  
817 *Am J Physiol Lung Cell Mol Physiol* 305:L352-63.
- 818 45. Miller JH. 1972. *Experiments in Molecular Genetics*. Cold Spring Harbor Laboratory,  
819 Cold Spring Harbor, NY.
- 820 46. Rio DC, Ares M, Jr., Hannon GJ, Nilsen TW. 2010. Purification of RNA using TRIzol (TRI  
821 reagent). *Cold Spring Harb Protoc* 2010:pdb.prot5439.
- 822 47. Goncz KK, Kunzelmann K, Xu Z, Gruenert DC. 1998. Targeted replacement of normal  
823 and mutant CFTR sequences in human airway epithelial cells using DNA fragments.  
824 *Hum Mol Genet* 7:1913-9.
- 825 48. Buckley AG, Looi K, Iosifidis T, Ling KM, Sutanto EN, Martinovich KM, Kicic-Starcevich  
826 E, Garratt LW, Shaw NC, Lannigan FJ, Larcombe AN, Zosky G, Knight DA, Rigby PJ,  
827 Kicic A, Stick SM. 2018. Visualisation of Multiple Tight Junctional Complexes in Human  
828 Airway Epithelial Cells. *Biol Proced Online* 20:3.
- 829 49. Hmelo LR, Borlee BR, Almlad H, Love ME, Randall TE, Tseng BS, Lin C, Irie Y, Storek  
830 KM, Yang JJ, Siehnel RJ, Howell PL, Singh PK, Tolker-Nielsen T, Parsek MR,



- 831 Schweizer HP, Harrison JJ. 2015. Precision-engineering the *Pseudomonas aeruginosa*  
832 genome with two-step allelic exchange. *Nat Protoc* 10:1820-41.
- 833 50. Figurski DH, Helinski DR. 1979. Replication of an origin-containing derivative of plasmid  
834 RK2 dependent on a plasmid function provided in trans. *Proc Natl Acad Sci U S A*  
835 76:1648-52.
- 836 51. Francis VI, Stevenson EC, Porter SL. 2017. Two-component systems required for  
837 virulence in *Pseudomonas aeruginosa*. *FEMS Microbiol Lett* 364.
- 838 52. Inclan YF, Persat A, Greninger A, Von Dollen J, Johnson J, Krogan N, Gitai Z, Engel JN.  
839 2016. A scaffold protein connects type IV pili with the Chp chemosensory system to  
840 mediate activation of virulence signaling in *Pseudomonas aeruginosa*. *Mol Microbiol*  
841 101:590-605.
- 842

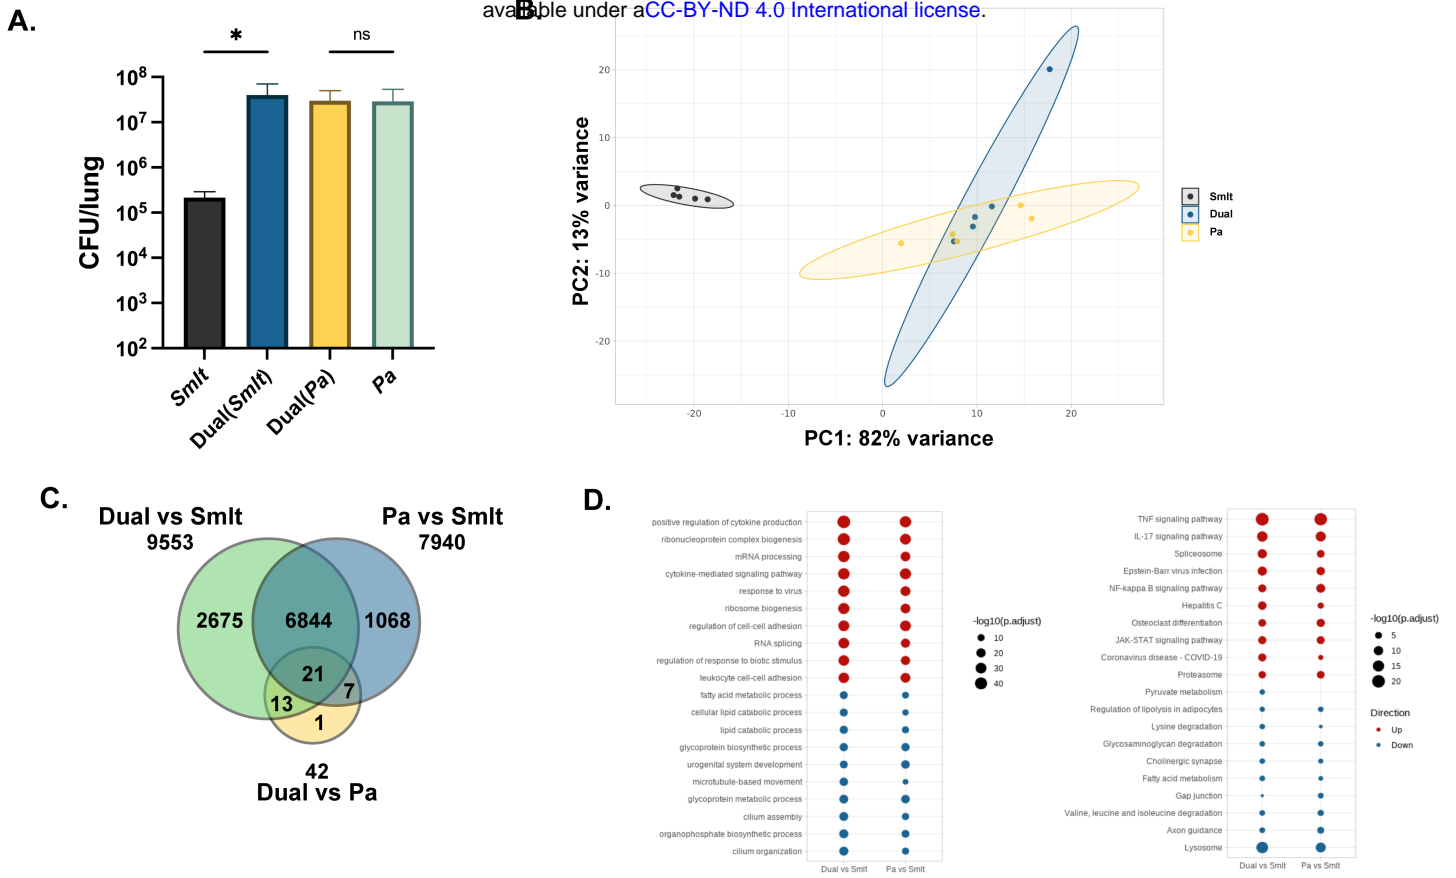

Figure 1

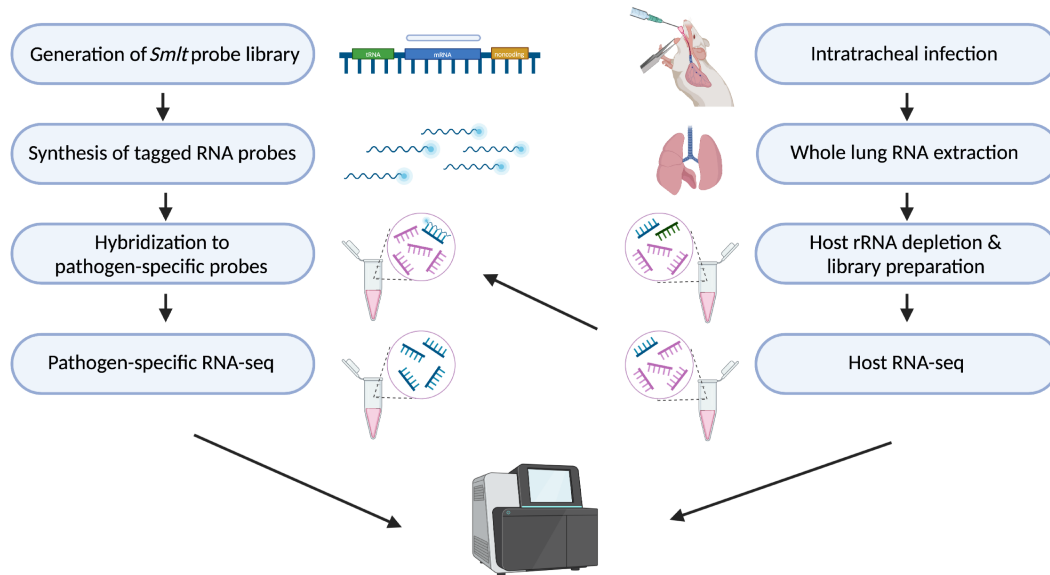

Figure 2

A.

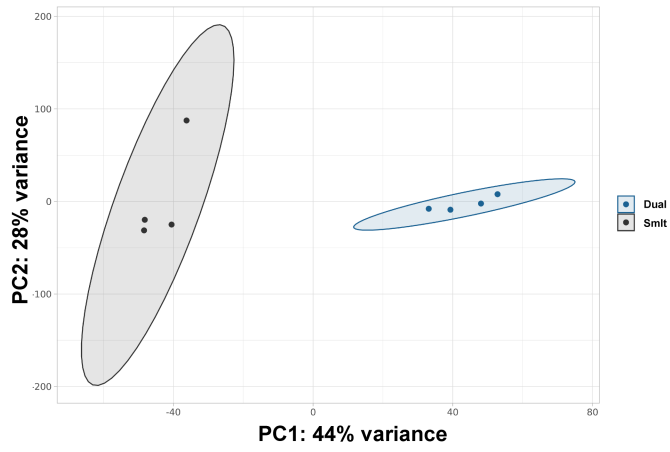

B.

| Gene ID  | log <sub>2</sub> Fold Change | P value  | P adj.   | Gene Name   | Function                                  |
|----------|------------------------------|----------|----------|-------------|-------------------------------------------|
| Smit4395 | 7.6139                       | 3.93E-07 | 3.90E-05 | -           | Putative serine protease                  |
| Smit3670 | 4.5334                       | 5.04E-07 | 4.70E-05 | <i>chpA</i> | Chemotaxis pili system protein ChpA       |
| Smit0048 | 7.1695                       | 9.42E-07 | 6.44E-05 | <i>aspC</i> | Aromatic-amino-acid transaminase          |
| Smit4623 | 6.6390                       | 4.32E-06 | 1.70E-04 | <i>acsA</i> | Acetyl-CoA synthetase                     |
| Smit3823 | 6.5925                       | 7.51E-06 | 2.63E-04 | <i>pilO</i> | Type IV pilus assembly protein PilO       |
| Smit4454 | -9.4879                      | 1.90E-11 | 2.92E-08 | -           | Conserved hypothetical protein            |
| Smit1316 | -8.4586                      | 6.11E-08 | 1.04E-05 | -           | Conserved hypothetical protein            |
| Smit1799 | -8.0039                      | 7.28E-07 | 5.60E-05 | <i>sdhB</i> | Succinate dehydrogenase                   |
| Smit0789 | -8.6138                      | 1.54E-06 | 8.78E-05 | -           | LysR-family transcriptional regulator     |
| Smit2250 | -6.8127                      | 5.90E-06 | 2.24E-04 | <i>cheR</i> | Chemotaxis protein methyltransferase CheR |

C.

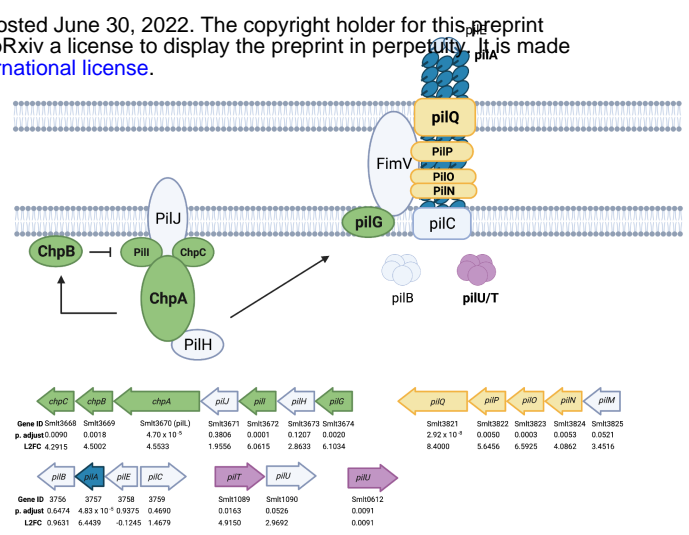

Figure 3

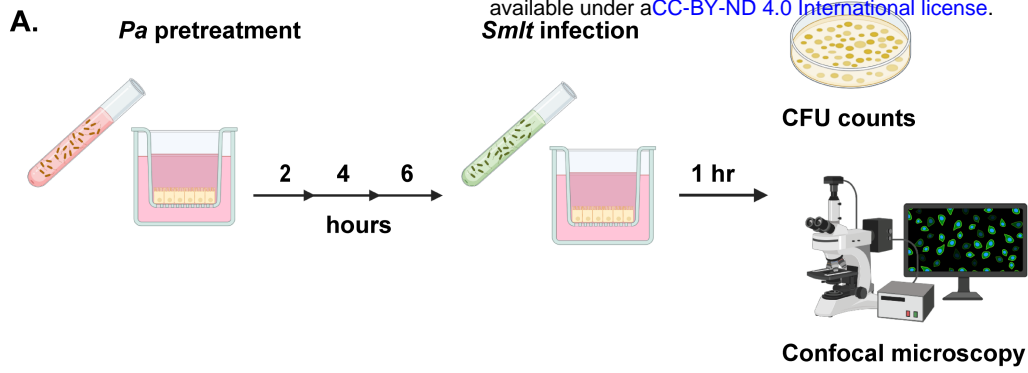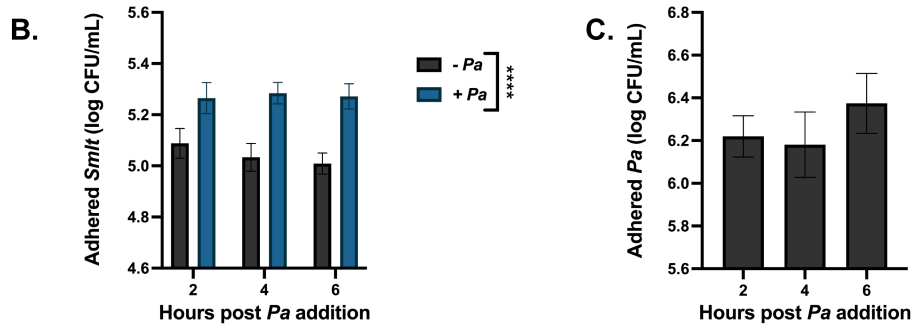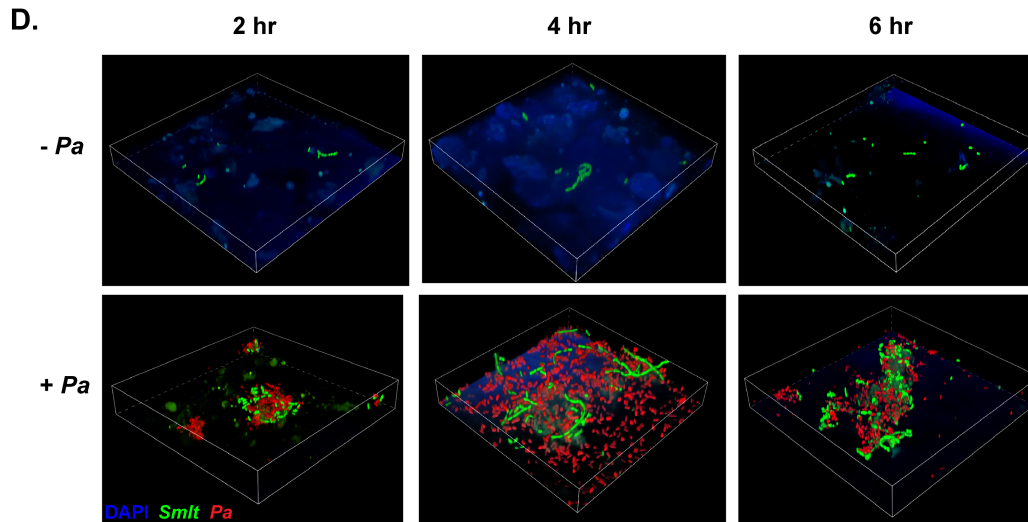

Figure 4

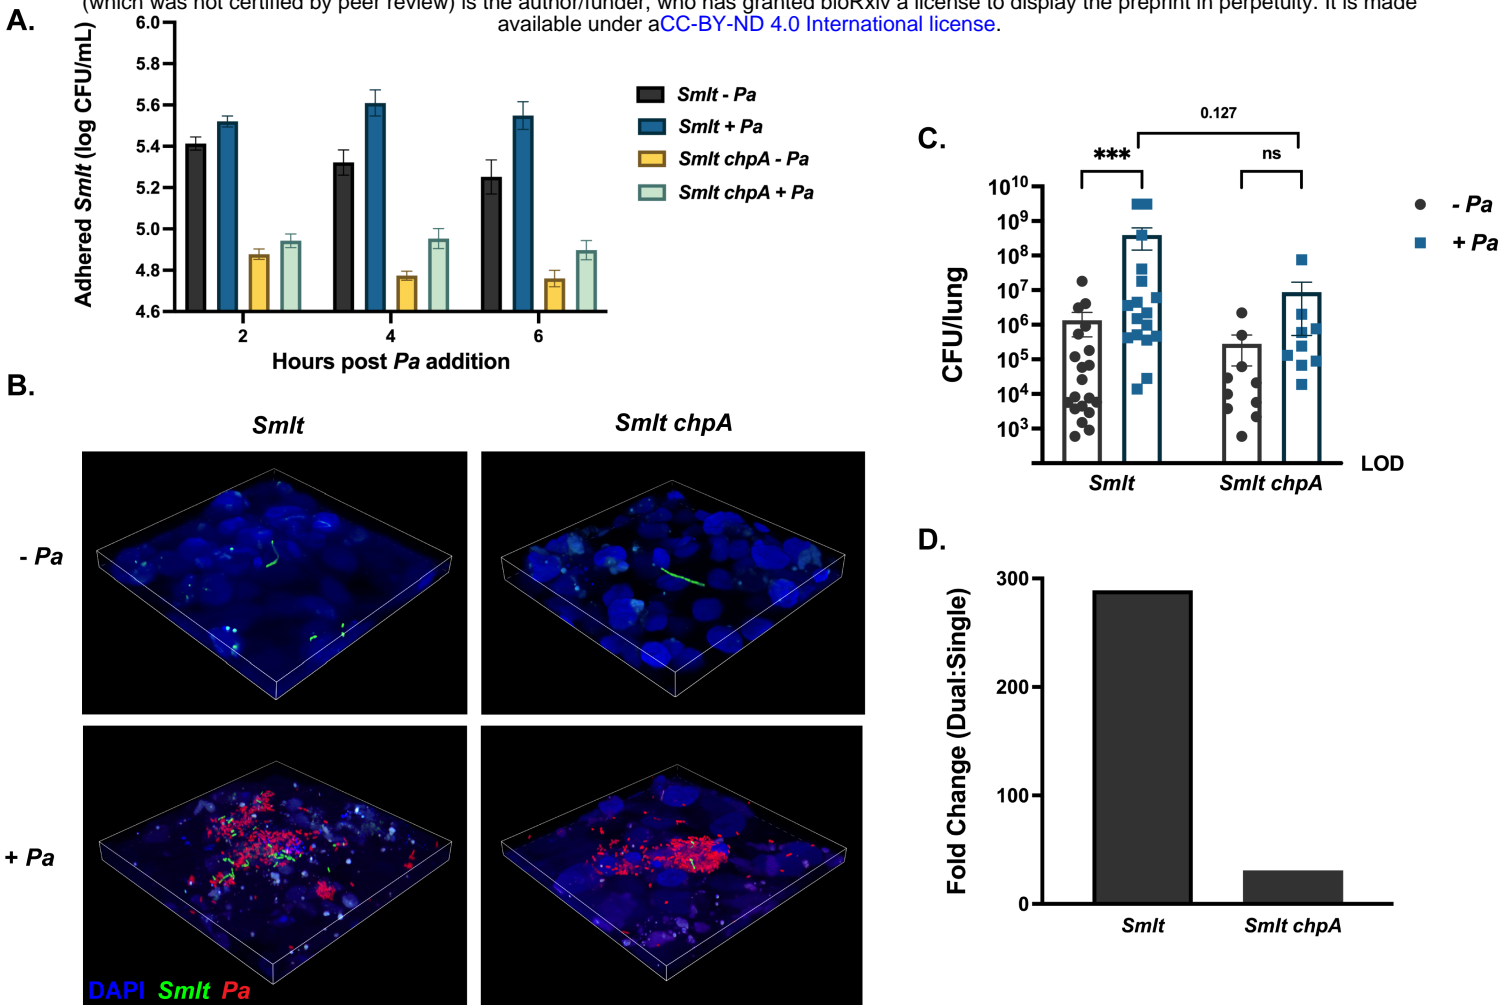

Figure 5

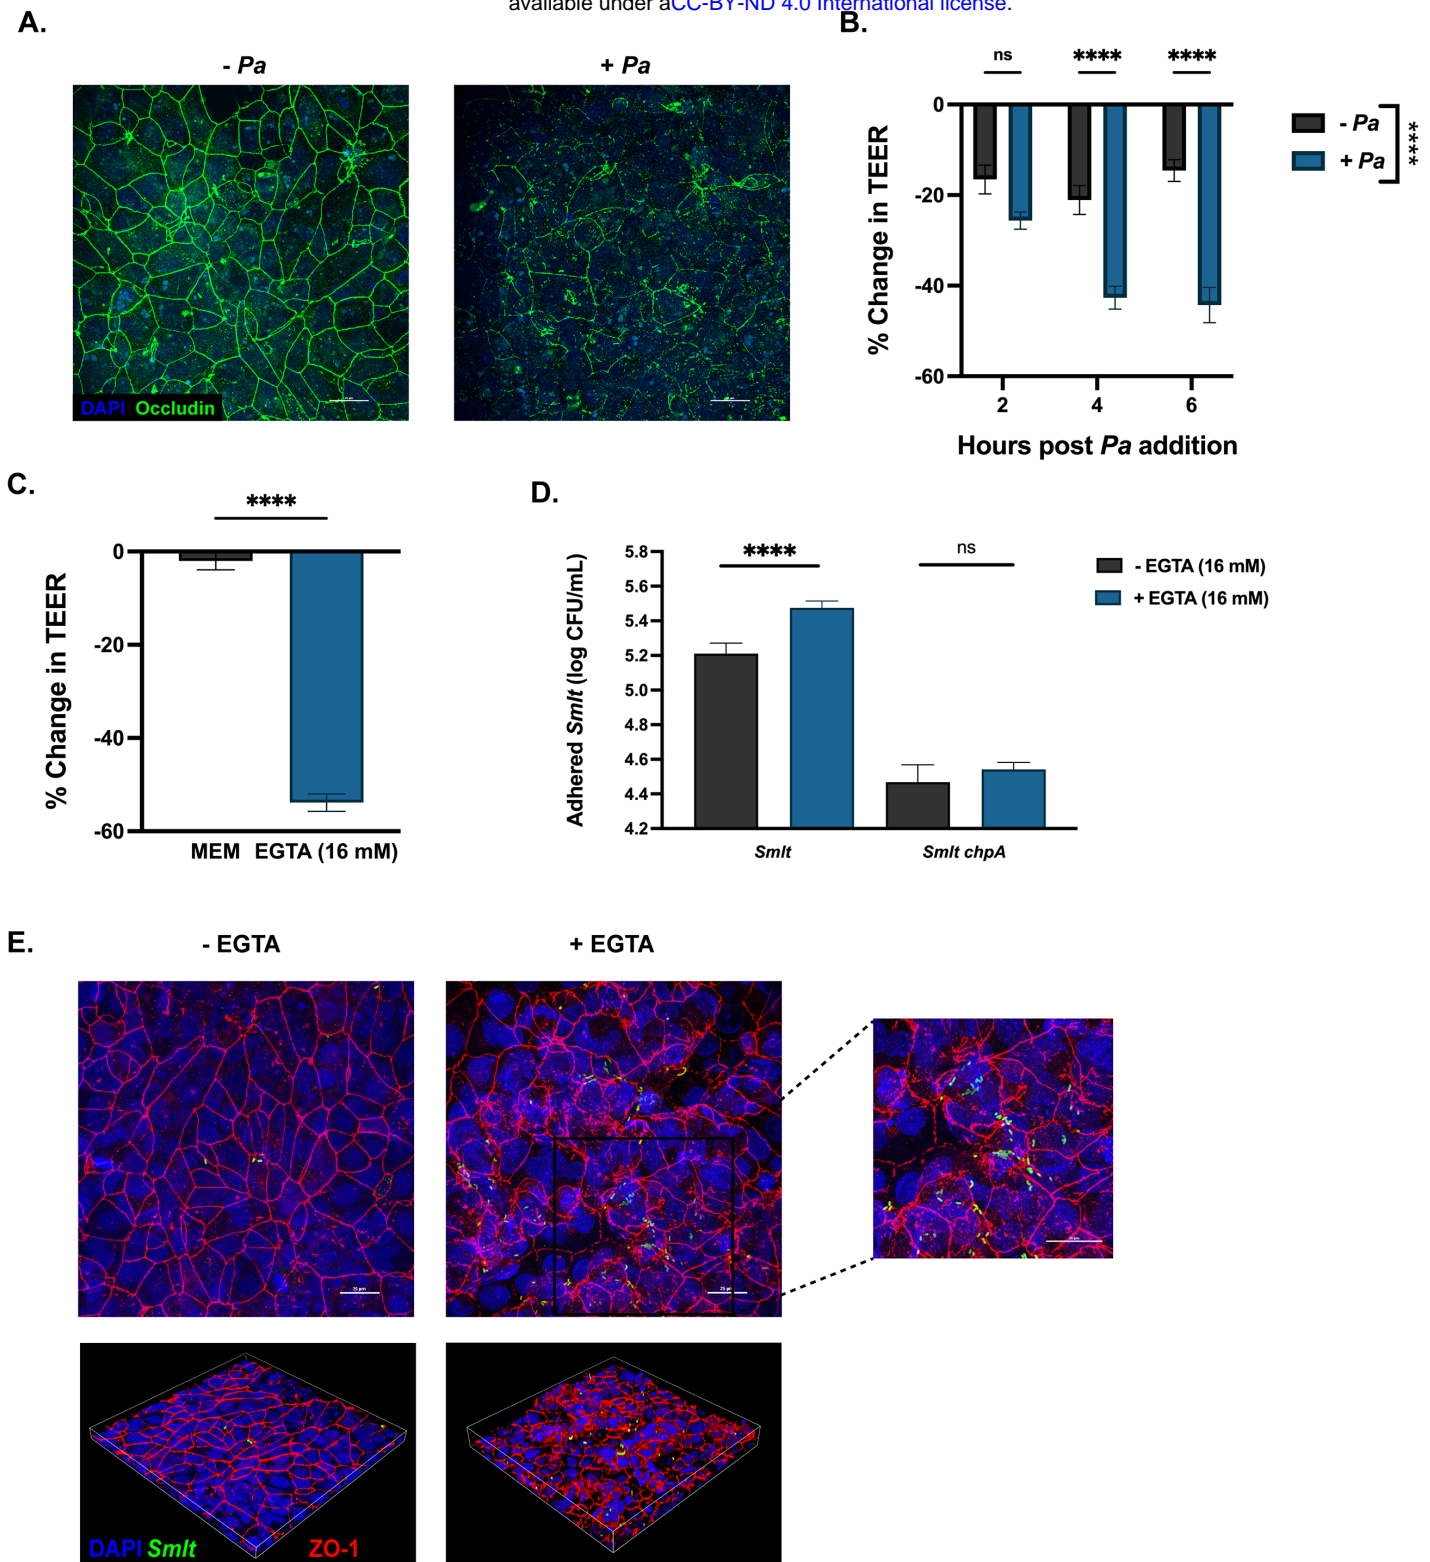

Figure 6

A.

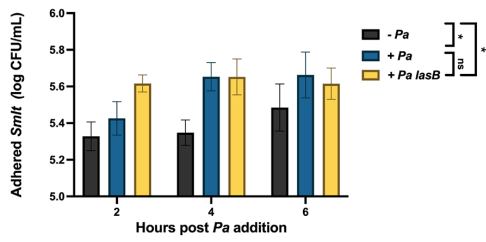

B.

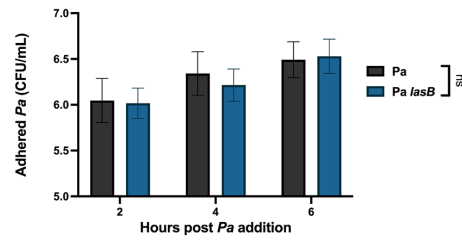

C.

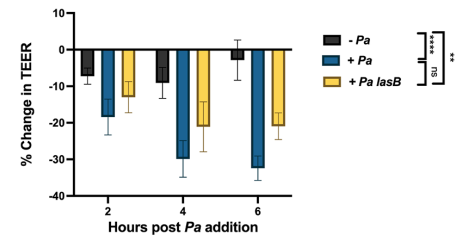

D.

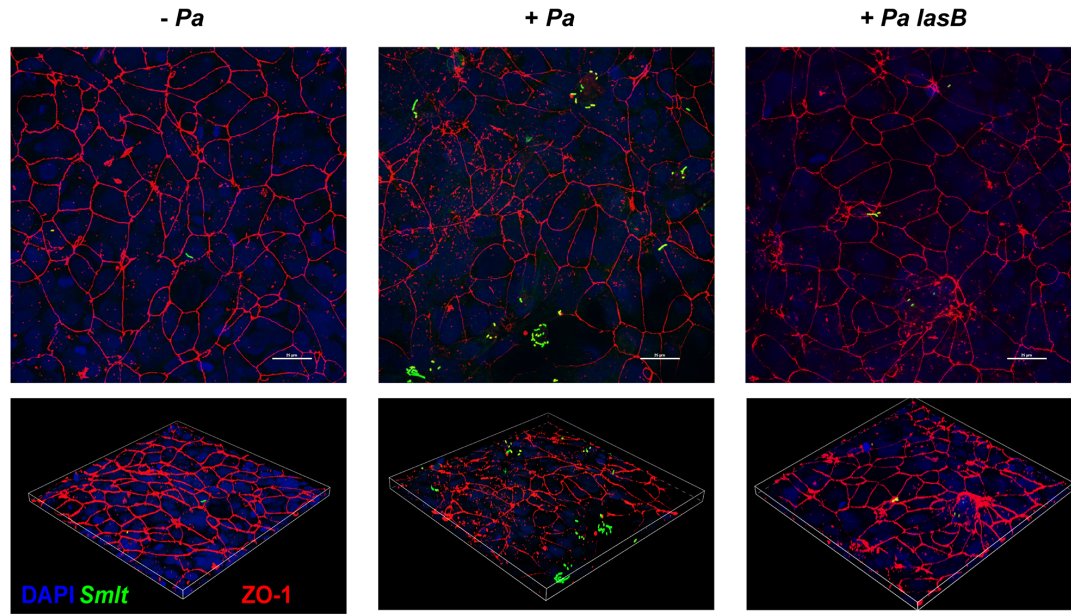

E.

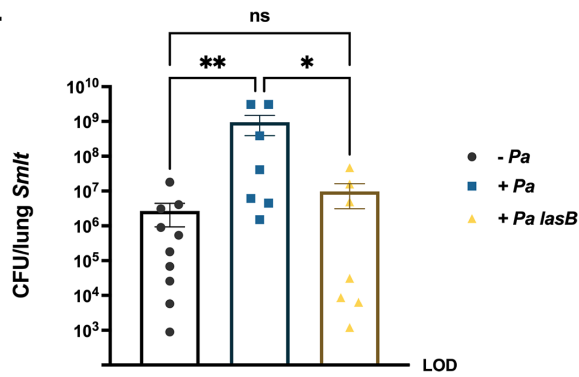

F.

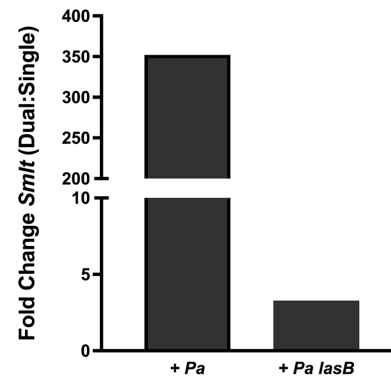

Figure 7
